# 1 **Pediatric nasal epithelial cells are less permissive to SARS-CoV-2** 2 **replication compared to adult cells**

3  
4 Yanshan Zhu<sup>1</sup>, Keng Yih Chew<sup>1</sup>, Anjana C. Karawita<sup>1</sup>, Ayaho Yamamoto<sup>2</sup>, Larisa L. Labzin<sup>3</sup>,  
5 Tejasri Yarlagadda<sup>4</sup>, Alexander A. Khromykh<sup>1,5</sup>, Claudia J. Stocks<sup>3</sup>, Yao Xia<sup>6</sup>, Tobias R.  
6 Kollmann<sup>7</sup>, David Martino<sup>7</sup>, Anthony Kicic<sup>7,8,9</sup>, Merja Joensuu<sup>10,11</sup>, Frédéric A. Meunier<sup>10,11</sup>,  
7 Giuseppe Balistreri<sup>11,12</sup>, Helle Bielefeldt-Ohmann<sup>1,5,13</sup>, Asha C. Bowen<sup>7,13</sup>, Peter D. Sly<sup>2,14</sup>,  
8 Kirsten M. Spann<sup>4</sup>, Kirsty R. Short<sup>1,5\*</sup>

9  
10 1 School of Chemistry and Molecular Biosciences, The University of Queensland, Brisbane,  
11 Australia

12 2 Child Health Research Centre, The University of Queensland, South Brisbane, QLD 4101,  
13 Australia

14 3 Institute for Molecular Bioscience, The University of Queensland, Brisbane, Australia

15 4 Centre for Immunology and Infection Control, Faculty of Health, School of Biomedical  
16 Sciences, Queensland University of Technology, Brisbane Queensland 4000, Australia

17 5 Australian Infectious Diseases Research Centre, Global Virus Network Centre of  
18 Excellence, Brisbane, Australia

19 6 School of Science, Edith Cowan University; School of Biomedical Science, The University  
20 of Western Australia, Perth, Australia

21 7 Wal-yan Respiratory Research Centre, Telethon Kids Institute, The University of Western  
22 Australia, Perth, Australia

23 8. Occupation and Environment, School of Public Health, Curtin University, Perth, Australia

24 9. Centre for Cell Therapy and Regenerative Medicine, School of Medicine and  
25 Pharmacology, The University of Western Australia, Perth, Australia

26 10. Clem Jones Centre for Ageing Dementia Research, Queensland Brain Institute, The  
27 University of Queensland, Brisbane, QLD, Australia.

28 11. Queensland Brain Institute, The University of Queensland, Brisbane, QLD, Australia.

29 12 Department of Virology, Faculty of Medicine, University of Helsinki, Finland

30 13 School of Veterinary Science, The University of Queensland, Gatton, Australia

31 14 Department of Infectious Diseases, Perth Children's Hospital, Nedlands, Perth, Western  
32 Australia

33

## 34 **\*Corresponding author:**

35 Kirsty R. Short, Ph.D., School of Chemistry and Molecular Biosciences, University of  
36 Queensland, Brisbane Australia

37 Phone: +61 7 336 54226; Email: [k.short@uq.edu.au](mailto:k.short@uq.edu.au)

38

39

40

41

42

43

44

45

46

47

48

49

50

51 **Abstract**

52 Children typically experience more mild symptoms of COVID-19 when compared to adults.  
53 There is a strong body of evidence that children are also be less susceptible to SARS-CoV-2  
54 infection with the original Wuhan isolate. The reasons for reduced SARS-CoV-2 symptoms  
55 and infection in children remain unclear and may be influenced by a multitude of factors,  
56 including differences in target cell susceptibility and innate immune responses. Here, we use  
57 primary nasal epithelial cells from children and adults, differentiated at an air-liquid interface  
58 to show that SARS-CoV-2 (both the Wuhan isolate and the more recent Alpha variant)  
59 replicates to significantly lower titers in the nasal epithelial cells of children compared to those  
60 of adults. This was associated with a heightened antiviral response to SARS-CoV-2 in the nasal  
61 epithelial cells of children. Importantly, influenza virus, a virus whose transmission is  
62 frequently associated with pediatric infections, replicated in both adult and paediatric nasal  
63 epithelial cells to comparable titres. Taken together, these data show that the nasal epithelium  
64 of children supports lower infection and replication of SARS-CoV-2 than the adult nasal  
65 epithelium.

66  
67  
68  
69  
70  
71

72 **Keywords:** SARS-CoV-2; pediatric nasal epithelial cells; anti-viral response; innate immune  
73 response; susceptibility to SARS-CoV-2 infection, alpha variant

74  
75  
76  
77  
78  
79  
80  
81  
82  
83  
84  
85  
86  
87  
88  
89  
90  
91  
92  
93

## 94 INTRODUCTION

95

96 Severe Acute Respiratory Syndrome-Coronavirus 2 (SARS-CoV-2), the causative agent of  
97 coronavirus disease-2019 (COVID-19), causes a broad range of clinical symptoms, ranging  
98 from asymptomatic infection to potentially fatal acute respiratory distress syndrome (ARDS).  
99 Children typically experience mild symptoms of COVID-19 when compared to adults <sup>1</sup>. There  
100 is also a significant body of evidence with the original Wuhan SARS-CoV-2 isolate that  
101 children are less susceptible to SARS-CoV-2 infection and less likely to transmit the virus.  
102 Specifically, a low rate of pediatric SARS-CoV-2 infections has been observed in multiple  
103 countries including China <sup>2</sup>, Italy <sup>3</sup>, the U.S.A <sup>4</sup>, Spain <sup>5</sup> and Poland <sup>6</sup>. Similarly, in a meta-  
104 analysis of SARS-CoV-2 household transmission clusters early in the pandemic, children were  
105 significantly less likely to contract SARS-CoV-2 from infected family members compared to  
106 adult members of the household <sup>7</sup>. These findings have been echoed in multiple single site  
107 studies where, both within and outside of households, the infection rate of SARS-CoV-2  
108 amongst children <10 years old is significantly lower than that of adults <sup>8</sup>. Reduced SARS-  
109 CoV-2 infection and transmission is also observed in juvenile ferrets compared to their older  
110 counterparts <sup>9</sup>.

111

112 In the second year of the SARS-CoV-2 pandemic numerous viral variants have become  
113 prevalent, including the Alpha variant (B.1.1.7) which contains multiple mutations in the spike  
114 protein, the N protein and various open reading frames (ORFs) of the virus. The SARS-CoV-2  
115 Alpha variant is of significant concern because of its increased transmissibility and possible  
116 increased virulence<sup>10</sup>. Early evidence suggests that the Alpha variant, similarly to original  
117 Wuhan isolate, is associated with low risk of severe disease in young children<sup>11,12</sup>. Some studies  
118 have suggested that children are more susceptible to the Alpha variant compared to the original  
119 Wuhan isolate<sup>13</sup> whilst others have found little evidence of differential susceptibility<sup>14</sup>.

120

121 The reduced susceptibility of children to SARS-CoV-2 infection and disease (at least some  
122 instances) is in stark contrast to other seasonal respiratory viruses, such as influenza virus,  
123 where children are thought to play a major role in the spread of the virus <sup>15</sup>. The reasons for less  
124 frequent SARS-CoV-2 infection and symptoms in children, at least with the original Wuhan  
125 isolate, remain unclear and may be influenced by a multitude of factors. Pre-existing immunity  
126 to SARS-CoV-2 (likely derived from seasonal coronaviruses) may offer some form of cross-  
127 protection from infection in children<sup>16</sup>. Indeed, SARS-CoV-2 spike glycoprotein reactive  
128 antibodies in uninfected individuals are more prevalent amongst children and adolescents <sup>16</sup>.

129

130 It is also possible that nasal epithelial cells (NECs), the first site of infection, are fundamentally  
131 different in children compared to adults. Gene expression studies using the nasal epithelium of  
132 healthy individuals suggests that the transcript for the SARS-CoV-2 receptor, angiotensin

133 converting enzyme-2 (*ACE2*), is expressed at lower levels in children compared to adults <sup>17</sup>.  
134 However, this has yet to be validated on a protein level. Moreover, this does not appear to be  
135 the case in all patient cohorts <sup>18,19</sup>. Following binding of the SARS-CoV-2 spike protein to  
136 *ACE2*, the host surface transmembrane serine protease 2 (*TMPRSS2*) is also involved in viral  
137 entry into the cell <sup>20</sup>. NECs from children express less *TMPRSS2* mRNA than those from adults,  
138 which may contribute to less frequent pediatric infections with SARS-CoV-2 <sup>21</sup>. However, this  
139 has also yet to be confirmed at protein level.

140

141 In addition to differential receptor expression, pediatric and adult NECs may also mount  
142 fundamentally different innate immune response to SARS-CoV-2. Recent RNA sequencing of  
143 the whole epithelium from pediatric and adult proximal airways suggests that there is a higher  
144 expression of genes associated with inflammation and the anti-viral response in children  
145 compared to adults <sup>22,23</sup>. Whilst increased inflammation and interferon production have  
146 previously been associated with elevated COVID-19 severity <sup>24</sup>, it is important to note that such  
147 studies refer to the inflammatory response in the lower respiratory tract, where any  
148 immunopathology may lead to respiratory distress <sup>25</sup>. In contrast, inflammation in the upper  
149 respiratory tract plays an important role in controlling early viral replication. Consistent with  
150 this supposition, nasopharyngeal swabs from SARS-CoV-2 infected children display elevated  
151 levels of interferons and inflammatory markers compared to those of SARS-CoV-2 infected  
152 adults <sup>18</sup>. However, whether this results in reduced replication of SARS-CoV-2 in the nasal  
153 epithelium of children remains to be determined.

154

155 Here, we use primary nasal epithelial cells (NECs), differentiated at an air-liquid interface, to  
156 investigate differential infection kinetics and antiviral responses to SARS-CoV-2 infection in  
157 children and adults.

158

159

160

161

162

163

164

165

166

167

168

169

170

171

## 172 **METHODS**

### 173 **Cell collection and ethics statement**

174 Primary NECs were collected from healthy adult (aged 21 to 65 years old) donors by placing a  
175 sterile nasal mucosal curette (Arlington Scientific Inc., USA) in the mid-inferior portion of the  
176 inferior turbinate during June 2020 to May 2021. Informed consent was obtained from all  
177 donors. Primary NECs were obtained from healthy pediatric donors (aged 2 to 7 years old) in  
178 the same manner while under general anesthetic prior to elective surgery for sleep apnoea or  
179 tonsillitis in 2019. Children did not have any other unknown underlying condition. A total of 10  
180 adult donors and 12 pediatric donors were used for this study. This study was approved by the  
181 University of Queensland's Human Research Ethics Committee (2020001742), the Queensland  
182 Children's Hospital and Health Service Human Research Ethics Committee  
183 (HREC/16/QRCH/215) and Queensland University of Technology Human Research Ethics  
184 Committee 17000000039). Primary NECs were stored in freezing media (FBS with 10%  
185 DMSO) after the second passage in culture.

### 187 **Cell culture**

188 African green monkey kidney epithelial Vero cells were maintained in MEM (Invitrogen),  
189 containing 10% (v/v) heat-inactivated fetal bovine serum (Cytiva), 100 U/ml penicillin and  
190 streptomycin (Life Technologies Australia). Madin-Darby Canine Kidney (MDCK) cells were  
191 maintained in DMEM (Invitrogen), containing 10% (v/v) heat-inactivated fetal bovine serum  
192 (Cytiva), 100 U/ml penicillin and streptomycin (Life Technologies Australia). All cell lines  
193 were obtained from American Type Culture Collection (ATCC; Virginia, USA). Primary NECs  
194 were expanded and passaged in Pneumacult EX Plus media (STEMCELL Technologies Inc,  
195 Canada). After initial expansion, NECs were seeded at a density of  $4-5 \times 10^5$  cells/transwell on  
196 6.5 mm transwell polyester membranes with 0.4µm pores (Corning Costar, USA) and cultured  
197 in EX Plus media (STEMCELL Technologies). Cells were monitored for confluence. When a  
198 confluent monolayer was achieved, cells were 'air-lifted' by removing the media from the  
199 apical chamber and replacing the basolateral media with Pneumacult air liquid interface (ALI)  
200 media (STEMCELL Technologies)<sup>26</sup>. Medium was replaced in the basal compartment three  
201 times a week, and the cells were maintained in ALI conditions for at least 3 weeks until ciliated  
202 cells and mucus were observed and cells obtained a transepithelial electrical resistance (TEER)  
203 measurement greater than 1000Ω. Fully differentiated cultures were used in downstream  
204 infection experiments using influenza virus or SARS-CoV-2.

### 206 **Viral stocks**

207 SARS-CoV-2 isolate hCoV-19/Australia/QLD02/2020 (QLD02) (used as the original Wuhan  
208 isolate) and hCoV-19/Australia/QLD1517/2020(QLD1517) (GISAID accession  
209 EPI\_ISL\_944644; Alpha variant) were kindly provided by Queensland Health Forensic &  
210 Scientific Services, Queensland Department of Health. Virus was amplified in Vero cells

211 expressing human TMPRSS2 and titrated by plaque assay <sup>27</sup>. All studies with SARS-CoV-2  
212 were performed under physical containment 3 (PC3) conditions and were approved by the  
213 University of Queensland Biosafety Committee (IBC/374B/SCMB/2020).  
214 A/Auckland/4/2009(H1N1) (Auckland/09) stocks were prepared in embryonated chicken eggs  
215 as previously described <sup>28</sup>. Viral titers were determined by plaque assays on MDCK cells, as  
216 previously described <sup>29</sup>.

217

### 218 **Viral infection**

219 Differentiate adult and pediatric NECs were infected with mock (PBS), QLD02 ( $1.25 \times 10^5$   
220 PFU), QLD1517 ( $2.4 \times 10^4$  PFU) or Auckland/09 ( $1.25 \times 10^5$  PFU). Specifically, 100 $\mu$ L of  
221 virus or PBS was placed on the epithelial surface in the apical compartment and incubated for  
222 1 hour at 37°C. Following incubation, excess virus was removed from the transwell and cells  
223 were incubated at 37°C with 5% CO<sub>2</sub>. Every 24 hours the basolateral media was refreshed with  
224 1mL of new ALI media. At pre-determined timepoints post-infection 100 $\mu$ L of PBS (or in the  
225 case of influenza virus PBS + 0.1 $\mu$ g of TPCK-treated trypsin (Worthington, USA)) was added  
226 to the apical compartment and cells were incubated at 37°C with 5% CO<sub>2</sub> for 10 minutes. The  
227 apical supernatant was subsequently removed and stored at -80°C. Cells were lysed with Buffer  
228 RLT (Qiagen, USA) containing 0.01%  $\beta$ -mercaptoethanol for RNA analysis. Alternatively,  
229 cells were lysed in 2% SDS/PBS lysis buffer (2% SDS/PBS buffer, 10% 10x PhosSTOP, 4%  
230 25x protease inhibitor) for protein analysis or fixed overnight in 4% paraformaldehyde for  
231 histology.

232

### 233 **Histology**

234 Fixed cells on a transwell membrane were routine processed and embedded in paraffin,  
235 sectioned at 5 $\mu$ m and subsequently stained with hematoxylin and eosin (H&E) or Periodic acid–  
236 Schiff (PAS). Sections were assessed for cellular morphology by a veterinary pathologist  
237 (H.B.O.) blinded to the experimental design.

238

### 239 **Immunofluorescence**

240 Differentiated epithelial cells grown on a transwell membrane were fixed with 4%  
241 paraformaldehyde (Cat#15710, Electron Microscopy Sciences) in PBS for 45 minutes at room  
242 temperature, followed by a blocking with 0.5% BSA (Sigma) in PBS for 30 minutes and  
243 permeabilization with 0.02% of Triton X-100 (Sigma) in PBS for 15 min at room temperature.  
244 After washing twice with PBS/BSA and a second blocking step for 10 min at room temperature,  
245 samples were incubated with primary antibodies overnight at 4°C. Primary antibodies were  
246 diluted in 0.5% BSA in PBS blocking solution: 1:400 ZO-1 (Cat#40-2200, Thermo Fisher  
247 Scientific); 1:1000 MUC5AC (Cat#MA5-12178, ThermoFisher Scientific); 1:500 ACE2  
248 (Cat#AF933, R&D Systems). After three washing steps with 0.5% BSA/PBS for 5 minutes  
249 each time, the samples were incubated in secondary antibody: 1:1000 Alexa Flour 555 donkey



250 anti-goat (Cat#A21432, Invitrogen) for 2.5 hours at room temperature in dark, and after three  
251 washes in PBS and three washes with 0.5% BSA/PBS, the cells were incubated with a 1:1000  
252 Alexa Fluor 647 goat anti-mouse (Cat#A32728, Invitrogen) for 2.5 hours at room temperature  
253 covered from light. The cells were simultaneously stained with 1:400 Alexa Fluor 647  
254 Phalloidin (Cat#A22287 Invitrogen) and 1:1000 DAPI. After three washes in PBS, the  
255 transwell membranes with cells were cut with a scalpel, briefly dipped in milli-q water, and  
256 mounted on a glass slide using ProLong Gold Antifade Mountant (Cat#P10144, ThermoFisher  
257 Scientific). Mounted samples were imaged on a spinning-disk confocal system (Marianas; 3I,  
258 Inc.) consisting of a Axio Observer Z1 (Carl Zeiss) equipped with a CSU-W1 spinning-disk  
259 head (Yokogawa Corporation of America), ORCA-Flash4.0 v2 sCMOS camera (Hamamatsu  
260 Photonics), and 63x 1.4 NA / Plan-Apochromat / 180  $\mu$ m WD objective. Image acquisition was  
261 performed using SlideBook 6.0 (3I, Inc). 150 optical sections from five random regions of  
262 interest (ROIs) from each sample were acquired from the top of the differentiated epithelial  
263 cells. Image processing was performed using Fiji/ImageJ (Version 2.1.0/1.53c) as follows:  
264 Background was reduced using the Subtract Background 50 pixel rolling ball radius, and the  
265 mean fluorescence intensity (MFI, a.u. arbitrary units) was measured from the average intensity  
266 images.

267

## 268 **Western Blot**

269 For total cell lysates, cells were washed twice with cold PBS and lysed with 2% SDS/PBS lysis  
270 buffer (2% SDS/PBS buffer, 10% 10x PhosSTOP, 4% 25x protease inhibitor). Pierce BCA  
271 protein assay kit (Thermo Fisher Scientific) was used to equalize protein amounts and SDS-  
272 sample buffer containing 100 mM DTT (Astral Scientific) was added. Samples were boiled at  
273 100°C for 10 minutes to denature proteins. Proteins were separated on 4-15% mini protean  
274 TGX precast gels (Biorad) in running buffer (200 mM Glycine, 25 mM Tris, 0.1% SDS, pH8.6),  
275 transferred to nitrocellulose membrane (Cat#1620112, BioRad) in blot buffer (48 mM Tris, 39  
276 mM Glycine, 0.04% SDS, 20% MeOH) and subsequently blocked with 5% (w/v) BSA in Tris-  
277 buffered saline with Tween 20 (TBST) for 30 minutes. The immunoblots were analyzed using  
278 primary antibodies incubated overnight at 4°C and secondary antibodies linked to horseradish  
279 peroxidase (HRP) (Invitrogen), and after each step immunoblots were washed 4x with TBST.  
280 HRP signals were visualized by enhanced chemiluminescence (ECL) (BioRad) and imaged  
281 with a Chemidoc (BioRad). Primary antibodies include GAPDH (14C10) Rabbit monoclonal  
282 antibody (1:2500 dilution, Cat#2118, Cell Signaling Technology), rabbit anti-SARS-CoV-2  
283 Nucleoprotein/NP antibody (1:1000 dilution, Cat#40143-R040, Sino Biological), goat  
284 polyclonal ACE2 (1:500 dilution, Cat#AF933, R&D Systems), rabbit anti-TMPRSS2 antibody  
285 (1:1000 dilution, Cat#ab109131, Abcam). ImageJ was used to quantify the protein expression  
286 level relative to GAPDH levels.

287

288

## 289 **Quantification of infectious virus**

290 SARS-CoV-2 titers in cell culture supernatants were determined by plaque assay on Vero cells,  
291 as described previously<sup>27</sup>. Influenza virus titers in cell culture supernatants were determined  
292 by plaque assay on MDCK cells<sup>29</sup>.

293

## 294 **RNA extraction and quantitative Reverse Transcription PCR (qRT-PCR)**

295 RNA was extracted from NECs using Nucleozole reagent according to the manufacturer's  
296 instructions, DNA was removed by DNase I (Thermo Fisher Scientific) treatment and 1 µg  
297 DNA-free RNA was reverse transcribed into cDNA using the High Capacity cDNA Reverse  
298 Transcription Kit (Applied Biosystems) on a Mastercycler Thermocycler (Eppendorf, Hamburg,  
299 Germany) according to the manufacturer's instructions using random primers. Real-time PCR  
300 was performed on generated cDNA with SYBER Green (Invitrogen) using QuantStudio 6 Flex  
301 Real-Time PCR System, an Applied Biosystems Real-Time PCR Instruments (Thermo Fisher  
302 Scientific). Gene expression was normalized relative to glyceraldehyde 3-phosphate  
303 dehydrogenase (*GAPDH*) expression, fold change was calculated using the  $\Delta\Delta C_t$  method. All  
304 primers used in this study are listed in Table 1.

305

306 **Table 1.** Primers used in the present study

307

| Primer name    | Sequence (5'-3')                                         |
|----------------|----------------------------------------------------------|
| <i>hIFIT1</i>  | FW: TTGCCTGGATGTATTACCAC<br>RV: GCTTCTTGCAAATGTTCTCC     |
| <i>hCXCL10</i> | FW: GTGGCATTCAAGGAGTACCTC<br>RV: GCCTTCGATTCTGGATTCAGACA |
| <i>hISG15</i>  | FW: GAGAGGCAGCGAACTCATCT;<br>RV: CTTCACTCTGACACCGACA)    |
| <i>hGAPDH</i>  | FW: CGAGATCCCTCCAAAATCAA;<br>RV: TTCACACCCATGACGAACAT    |

308

## 309 **RNA Sequencing**

310 RNA-Seq libraries were prepared using the Illumina stranded total RNA prep ligation with the  
311 Ribo-Zero plus kit (Illumina) and IDT for Illumina RNA UD Indexes according to the standard  
312 manufacturer's protocol. Briefly, 50ng of total RNA was depleted of rRNA and then  
313 fragmented by heat. cDNA was synthesized from the fragmented RNA using random primers.  
314 The first strand cDNA was converted into dsDNA in the presence of dUTP to maintain the  
315 'strandedness' of the library. The 3' ends of the cDNA were adenylated and pre-index anchors  
316 were ligated. The libraries were then amplified with 14-16 cycles of PCR incorporating unique  
317 indexes for each sample to produce libraries ready for sequencing. The libraries were quantified  
318 on the Perkin Elmer LabChip GX Touch with the DNA High Sensitivity Reagent kit (Perkin  
319 Elmer). Libraries were pooled in equimolar ratios, and the pool was quantified by qPCR using



320 the KAPA Library Quantification Kit - illumina/Universal (KAPA Biosystems) in combination  
321 with the Life Technologies Viia 7 real time PCR instrument.

322

323 Sequencing was performed using the Illumina NextSeq500 (NextSeq control software v2.2.0 /  
324 Real Time Analysis v2.4.11). The library pool was diluted and denatured according to the  
325 standard NextSeq protocol and sequenced to generate single-end 76 bp reads using a 75 cycle  
326 NextSeq500/550 High Output reagent Kit v2.5 (Illumina). After sequencing, fastq files were  
327 generated using bcl2fastq2 (v2.20.0.422), which included trimming the first cycle of the insert  
328 read. Library preparation and sequencing was performed at the Institute for Molecular  
329 Bioscience Sequencing Facility (University of Queensland).

330

### 331 **RNA Sequencing analysis**

332 The quality of the trimmed RNA-seq reads was assessed with FastQC<sup>30</sup> and MultiQC<sup>31</sup>.  
333 Salmon<sup>32</sup> was used for transcript quantification from human transcriptome (GENCODE  
334 Release 36, accessed in December 2020). A decoy aware transcriptome file was created for  
335 Salmon transcript quantification followed by the transcriptome index<sup>32</sup>. The R package,  
336 DESeq2<sup>33</sup> was then used for differential gene expression (DGE) analysis and further validated  
337 through using the limma R package<sup>34</sup> with Voom transformation<sup>35</sup>. DGEs between virus and  
338 mock infected samples were analyzed by controlling the effect of the age group and gender of  
339 the individual samples, genes with adjusted *p*-value less than 0.05 were considered significant.  
340 Gene set enrichment analysis was performed using the R package Goseq<sup>36</sup>. All the R scripts  
341 were run on R-Studio platform (RStudio Team 2020, v 1.4.1717).

342

### 343 **Code and data availability**

344 RNA-seq data is deposited at European Nucleotide Archive under the project– PRJEB43102.  
345 The scripts used for RNA-seq data analysis including differential gene expression and gene set  
346 enrichment analysis can be found in [https://github.com/akaraw/Yanshan\\_Zhu\\_et\\_al](https://github.com/akaraw/Yanshan_Zhu_et_al).

347

### 348 **Statistical analysis**

349 Where sufficient cell numbers were present, samples were performed in duplicate, and the  
350 results were averaged and shown as a single data point. If sufficient cells were not present, a  
351 single transwell was used to determine the response of that donor to viral infection. Data were  
352 tested for normality using the Shapiro-Wilk test. Outliers of continual variables were removed  
353 using ROUT's test (Q = 1%). Where data were normally distributed, data was analyzed using  
354 an unpaired two-tailed student's t-test. Where data were not normally distributed, data was  
355 analyzed using a Mann-Whitney U test. Significance was set at  $p < 0.05$ .

356

357

358

## 359 RESULTS

### 360 **Pediatric nasal epithelial cells are phenotypically different to adult nasal epithelial cells**

361 To investigate the role of NECs in SARS-CoV-2 infection, adult and pediatric NECs were  
362 differentiated at an air-liquid interface. The phenotype of these cells at baseline (i.e., prior to  
363 infection) was then assessed. Adult NECs grew as a pseudostratified columnar epithelium with  
364 scattered goblet cells and ciliated epithelial cells (Figure 1A). Pediatric NECs also grew as a  
365 pseudostratified columnar epithelium with ciliated epithelial cells and goblet cells (Figure 1A).  
366 However, scattered cells with pyknotic nucleus and condensed cytoplasm were also observed,  
367 leaving pseudocysts in the epithelium (Supplementary Figure 1). This is potentially indicative  
368 of higher cell turn-over and metabolic rate in the pediatric epithelial cells <sup>37,38</sup>.  
369 Immunofluorescence images of zonal occludens-1 (ZO-1) stained NECs show that tight  
370 junction proteins were built up closely towards the apical region of both adult and pediatric  
371 cells (Figure 1B). PAS staining indicated the presence of mucus producing cells (Figure 1A) in  
372 both pediatric and adult NECs. Consistent with these data, MUC5AC staining was detected  
373 exclusively on the apical layer, thus demonstrating mucus secretion by differentiated NECs  
374 (Figure 1B).

375

376 Previous mRNA expression studies suggest that pediatric NECs express lower levels of *ACE2*  
377 and *TMPRSS2* compared to their adult counterparts <sup>17,21</sup>. However, these findings are  
378 inconsistent between patient cohorts and have not been investigated at a protein level <sup>19</sup>.  
379 Immunofluorescence staining suggested that pediatric NECs had lower surface levels of ACE2  
380 compared to their adult counterparts (Figure 1B) although a limited sample size precluded  
381 statistical analysis (Figure 1C). Accordingly, we sought to confirm these data using western  
382 blot on the NECs from a larger number of donors (n = 5) (Figure 1D). Whilst the same trend  
383 was observed by western blot (increased levels of ACE2 in adult NECs) this failed to reach  
384 statistical significance (Figure 1D). There was no observable trend in TMPRSS2 levels between  
385 adult and pediatric NECs (Figure 1D).

386

### 387 **Pediatric nasal epithelial cells are less permissive to SARS-CoV-2 replication**

388 We next sought to determine if pediatric NECs were less susceptible than adult NECs to SARS-  
389 COV-2 (QLD02) replication. Strikingly, significantly reduced SARS-CoV-2 replication was  
390 observed in pediatric NECs at 24- and 72-hours post-infection (h.p.i) (Figure 2A). Reduced  
391 SARS-CoV-2 N protein level was also observed in pediatric NECs at 72 h.p.i, although this did  
392 not reach statistical significance (p = 0.07; Figure 2B and C, Supplementary Figure 2). To  
393 determine if decreased viral replication was specific to SARS-CoV-2, these experiments were  
394 repeated using influenza A virus, which is one of the many respiratory viruses known to be  
395 highly transmissible amongst children <sup>39</sup>. No significant difference in influenza A virus  
396 replication in pediatric NECs compared to adult cells was observed at 24-, 48- and 72-hour  
397 post-infection (Figure 2D).

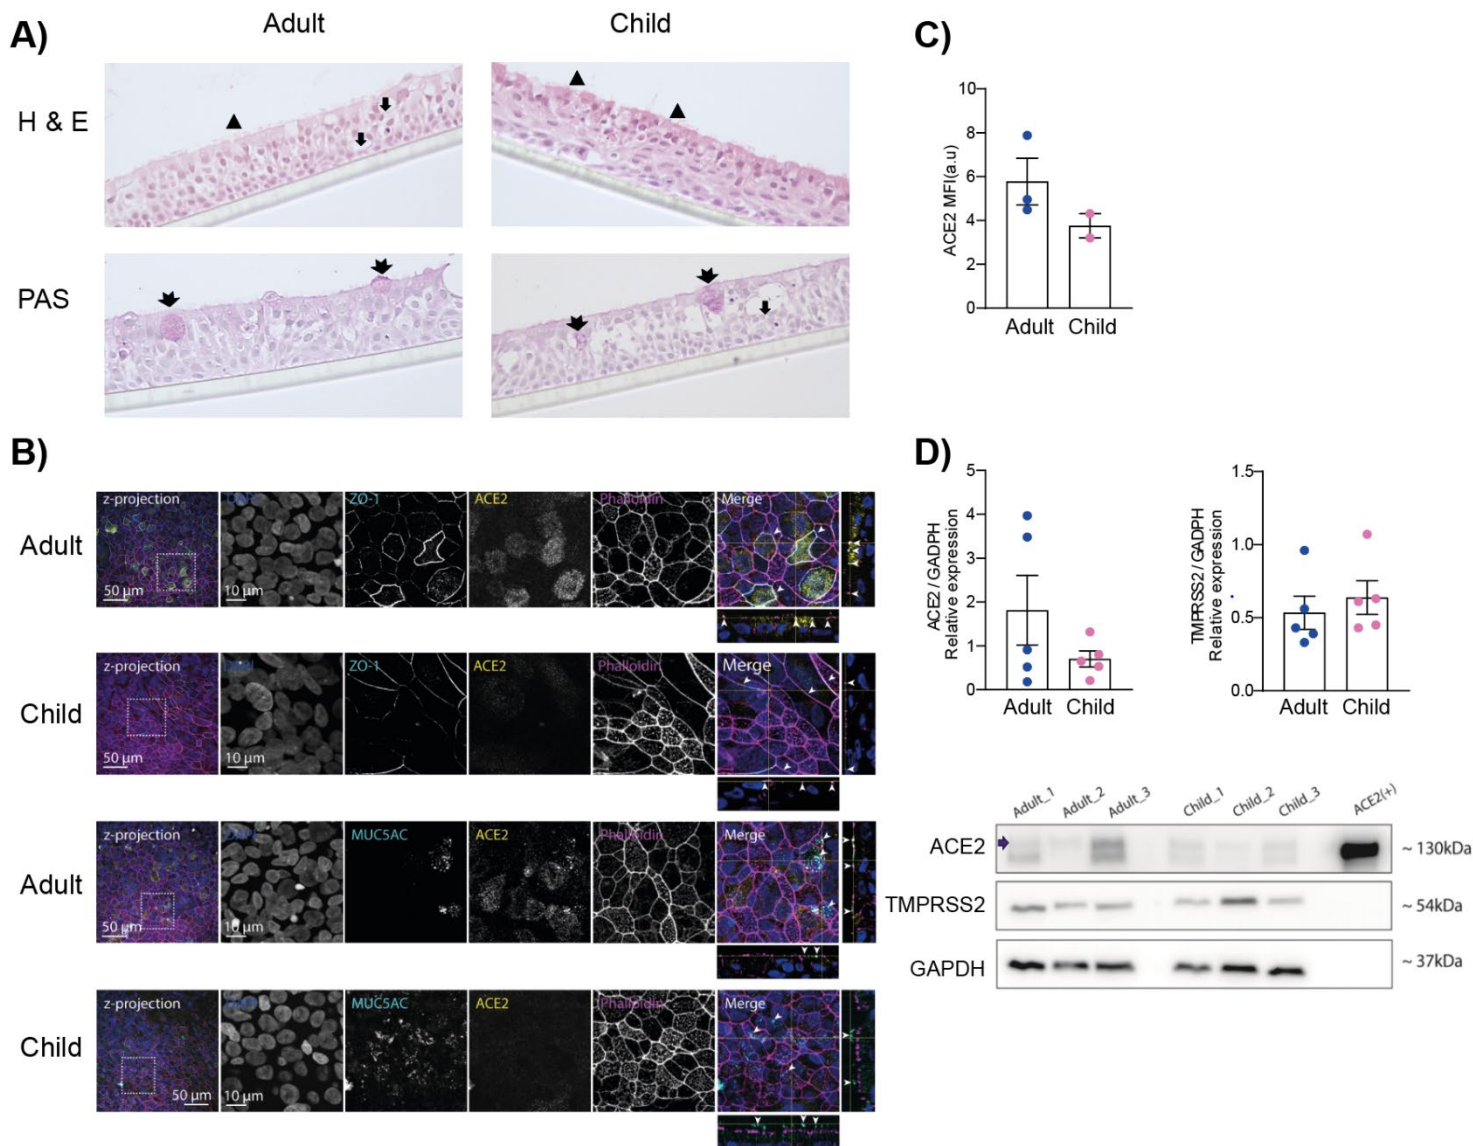

398 **Figure 1. Pediatric nasal epithelial cells are phenotypically different to adult nasal**  
 399 **epithelial cells.** **A)** Representative H&E and PAS-stained sections of pediatric and adult NECs  
 400 culture differentiated at an air-liquid interface (representative of 2 adult (1 female, 1 male) and  
 401 3 pediatric donors (1 female, 2 males)). Arrowheads indicate ciliated cells, arrows indicate  
 402 goblet cells and double-tailed arrows indicate mucus producing cells as determined by PAS  
 403 staining. Images taken at 400x magnification. **B)** Representative z-projections (150 optical  
 404 sections) of pediatric and adult NECs cultures differentiated at an air-liquid interface and  
 405 immunolabelled against endogenous ZO-1 and ACE2 (cyan and yellow, respectively, top  
 406 panels), and MUC5AC and ACE2 (cyan and yellow, respectively, bottom panels). Cells were  
 407 also stained with DAPI (blue) and phalloidin (magenta) to indicate the nucleus and actin  
 408 filaments, respectively. The area in the dotted box in the images on left are shown magnified in  
 409 the respective rows (10  $\mu$ m bar applies to all images in the row). The merged image on right  
 410 shows the orthogonal view of the z-stacks. The arrowheads indicate the zonal occludens-1 (ZO-  
 411 1) stained profiles (top panels) and mucus secretion (MUC5AC) in the lower panels. **C)**  
 412 Quantification of ACE2 immunofluorescence as described in the Materials and Methods. Mean  
 413  $\pm$  SEM is shown. Each data point represents the average of five separate images taken from one

414 donor (pediatric (1 female, 1 male) and adult (2 females, 1 male) donor). **D)** Relative ACE2  
415 and TMPRSS2 protein levels compared to GAPDH in pediatric (3 females, 2 males) and adult  
416 (4 females, 1 male) NECs. Each data point represents a different donor. Mean  $\pm$  SEM is shown.  
417 C) Representative western blot of NECs from three adult and three pediatric donors blotted for  
418 ACE2, TMPRSS2 and GAPDH. ACE2 is indicated with an arrow.  
419  
420  
421

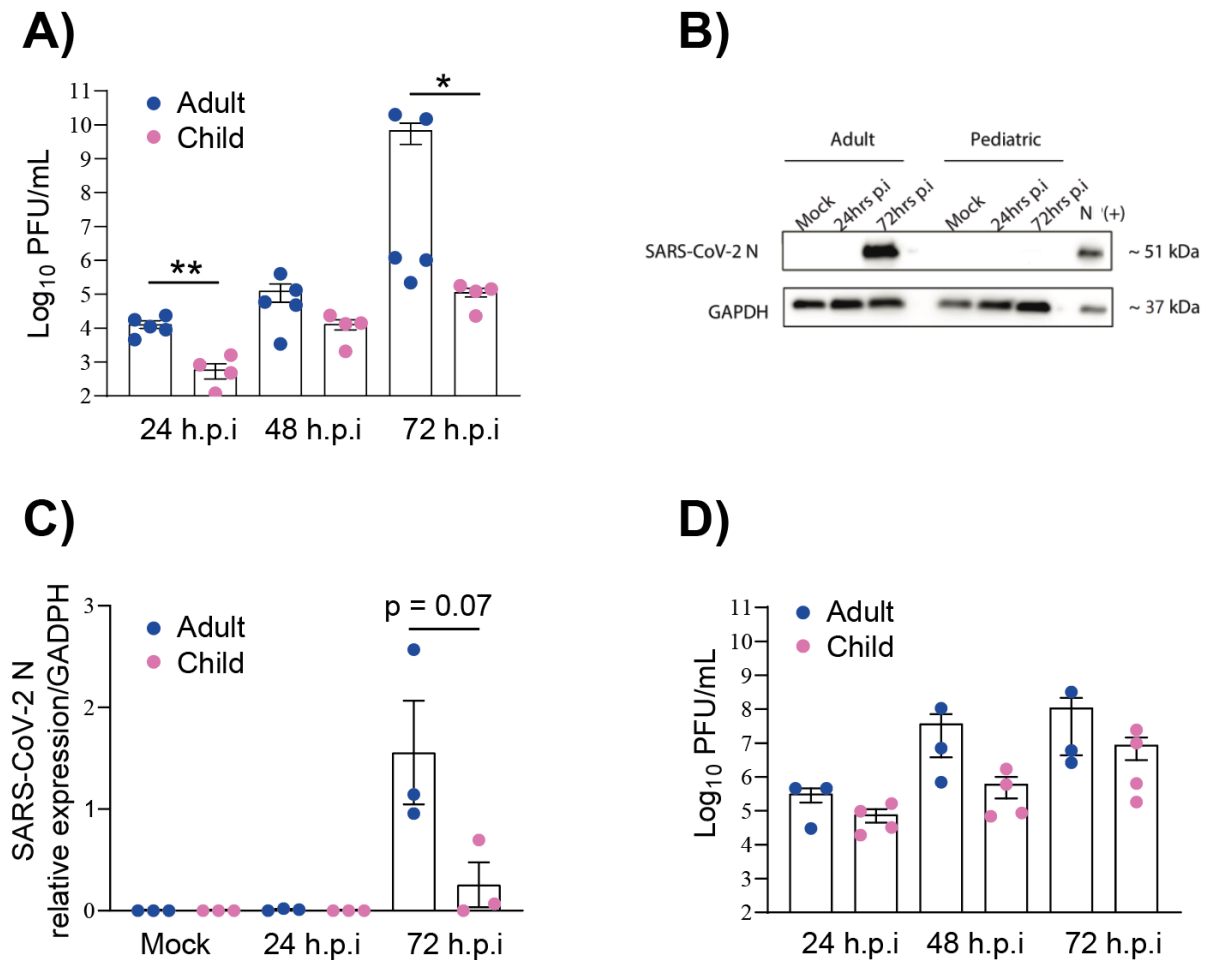

422  
423

424 **Figure 2. Lower replication of SARS-CoV-2 in pediatric nasal epithelial cells.** **A)** Plaque  
425 forming units (PFU) of SARS-CoV-2 (QLD02) from the apical surface of nasal epithelial cells  
426 NECs obtained at 24, 48 and 72 h.p.i. **B)** Representative western blot of adult and pediatric  
427 donor blotted for SARS-CoV-2 N at various timepoints post-infection. All the western blot  
428 results (n= 3 adults and n = 3 children) for SARS-CoV-2 N are shown as Supplementary Figure  
429 2. **C)** Relative SARS-CoV-2 N levels compared to GAPDH in pediatric and adult NECs. **D)**  
430 Plaque forming units (PFU) of influenza A virus from the apical surface of NECs at various  
431 timepoints post-infection. Each data point represents a separate donor. Mean  $\pm$  SEM is shown.  
432  $p < 0.05^*$ ,  $p < 0.01^{**}$ . Statistical analysis performed as described in the Materials and Methods.

433  
434

### 435 **Pediatric nasal epithelial cells mount a strong anti-viral response to SARS-CoV-2**

436 To gain a further insight into the observed decrease of SARS-CoV-2 replication in pediatric  
437 NECs RNA Seq was performed on infected adult and pediatric cells 72 hours post-SARS-CoV-  
438 2 (QLD02) infection. PCA analysis showed that infected cells formed distinct clusters  
439 depending on whether they were derived from pediatric or adult donors (Figure 3A). Numerous  
440 differentially genes were recorded in infected cells (Figure 3B). In infected pediatric NECs,  
441 gene ontology (GO) enrichment analysis (Figure 3C) demonstrated a strong interferon response,  
442 with GO terms such as ‘viral process’, ‘type I interferon signaling’, ‘response to virus’,  
443 ‘regulation of defense response to virus’, ‘negative regulation of viral genome replication’,  
444 ‘defense response to virus’ and ‘cellular response to interferon alpha’. None of these GO terms  
445 were identified amongst the top differentially expressed GO terms in adult cells infected with  
446 SARS-CoV-2 (Figure 3D). In contrast, GO terms such as ‘cellular response to sterol’, ‘Wnt  
447 signalling pathway’ and ‘response to tumor necrosis factor’ were recorded. To confirm that  
448 these data were not restricted to a DESeq2 analysis, gene expression data were also analyzed  
449 using limma (Table 2 & 3). Once again, in infected pediatric NECs GO terms such as ‘response  
450 to virus’, ‘cellular response to cytokine stimulus’ and ‘defense response to virus’ were recorded  
451 (Table 2). In contrast, infected adult NECs were associated with GO terms such as ‘detection  
452 of stimulus involved in sensory perception’ and ‘sensory perception’ (Table 3). To further  
453 validate these data, we assessed gene expression by qPCR of three genes associated with  
454 inflammatory/anti-viral response - interferon-induced protein with tetratricopeptide repeats 1  
455 (*IFIT1*); C-X-C motif chemokine ligand 10 (*CXCL10*) and interferon stimulated gene 15  
456 (*ISG15*). Consistent with our RNA Seq data, infected pediatric NECs had significantly higher  
457 levels of *IFIT1* and *ISG15* compared to infected adult NECs (Figure 4A). Interestingly, these  
458 data were not restricted to SARS-CoV-2 infection and a similar expression profile was observed  
459 following influenza A virus infection (Figure 4B).

460

461 It has been suggested that children may be more susceptible to the recent SARS-CoV-2 variants  
462 of concern (VOC) compared to the original SARS-CoV-2 isolate. To determine if our findings  
463 were restricted to the parental Wuhan isolate, we infected pediatric and adult NECs with the  
464 Alpha variant (QLD1517). Consistent with our previous data we observed increased viral  
465 replication in adult NECs compared to those derived from pediatric donors (Figure 5A). This  
466 differential replication was associated with a differential expression of key interferon associated  
467 genes (Figure 5B).

468

469

470

471

472

473



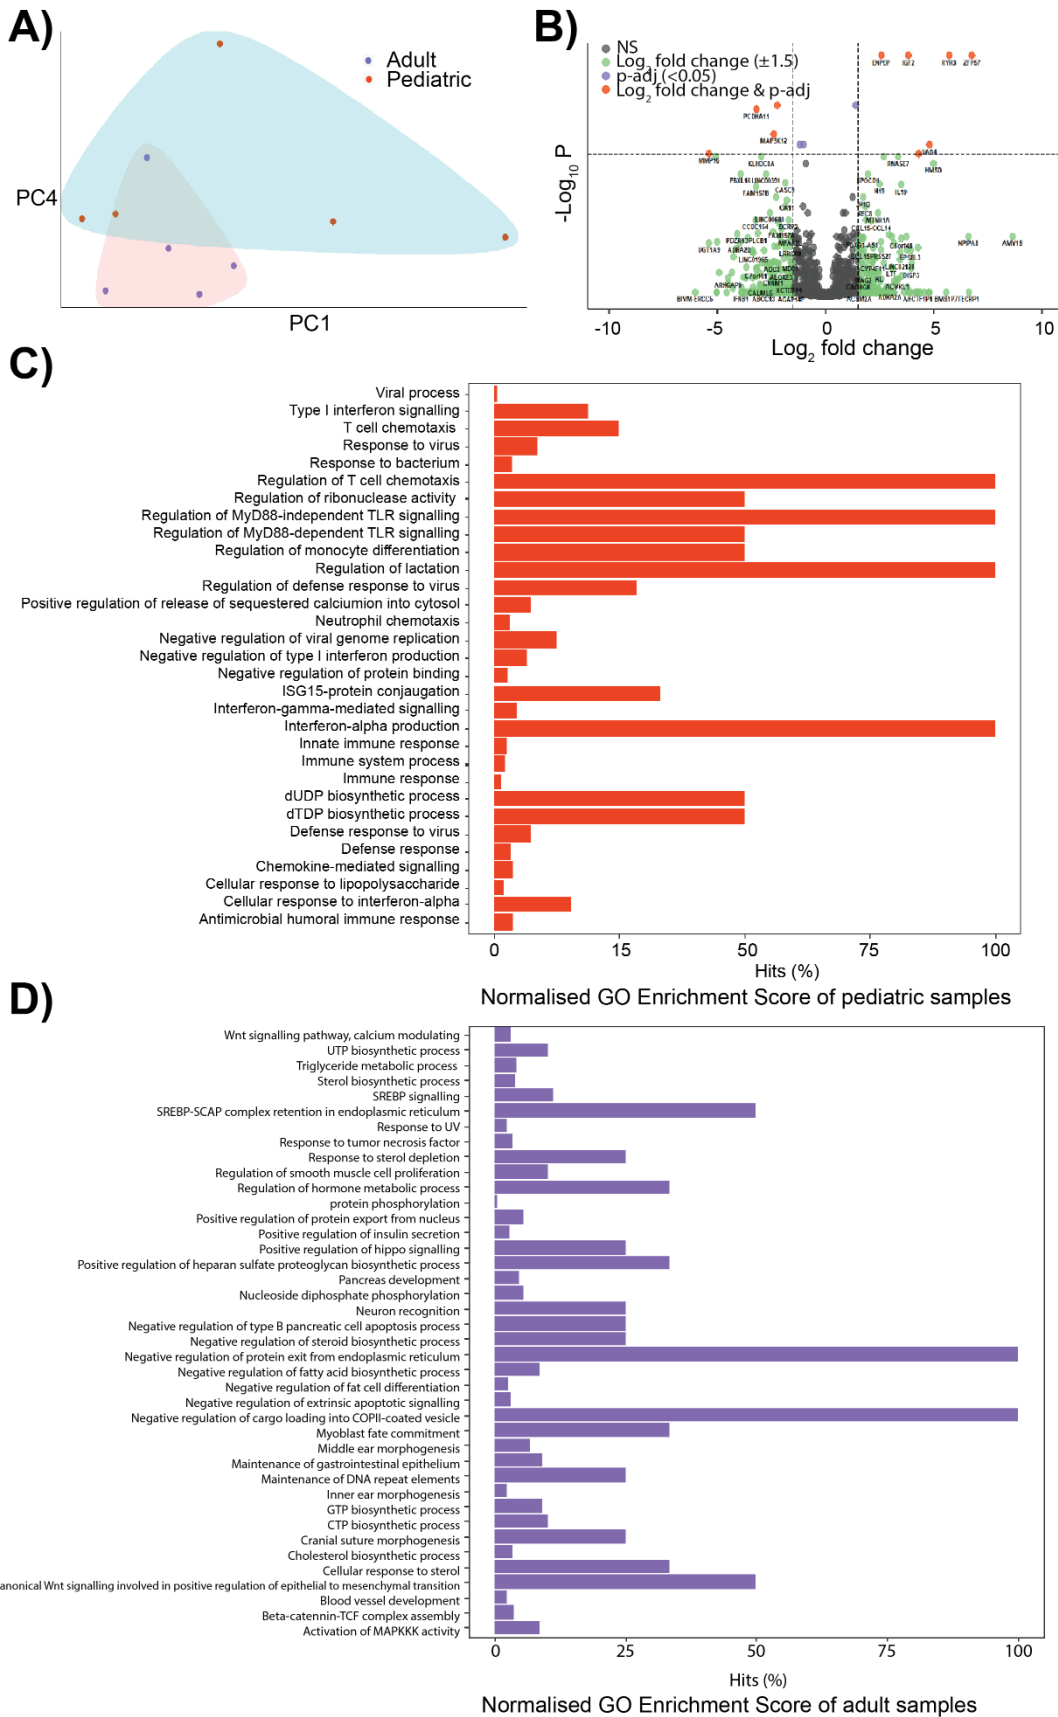



475 **Figure 3: Pediatric epithelial cells have a different transcriptional response to SARS-CoV-**  
476 **2. A)** Principal component analysis for the global transcriptional response of naive pediatric  
477 and adult NECs. Data points represent individual donors. **B)** Volcano plot illustrating  
478 differentially expressed genes (DEGs) of naive pediatric NECs compared to adult cells. DEGs  
479 statistically different between the two patient groups with a fold change of >1.5 are indicated  
480 in orange. DEGs statistically different between two groups with a fold change of <1.5 are shown  
481 in purple. DEGs not statistically different between two groups with a fold change of >1.5 are  
482 shown in green. NS = not significant. **C)** Gene ontology (GO) analysis of DEGs in infected  
483 pediatric NECs were displayed by the bar chart. The bars of significantly GO enriched  
484 (Overrepresented  $p$  value < 0.05) results were marked in red, x-axis reflects the gene count hits  
485 as a percentage over genes in each GO category; y-axis reflects different GO terms. **D)** Gene  
486 ontology (GO) analysis of DEGs in adult NECs were displayed by the bar chart. The bars of  
487 significantly enriched GO (Overrepresented  $p$  value < 0.05) enrichment results were marked in  
488 purple and represents the gene count hits (as a percentage over number of genes in a given  
489 category); y-axis reflects different GO terms.  
490

491  
492  
493  
494

495 **Table 2: Significantly enriched gene ontology (Overrepresented  $p$  value < 0.05) terms in**  
496 **SARS-CoV-2 infected pediatric cells (relative to naïve cells)**

|            | <b>Term</b>                             |
|------------|-----------------------------------------|
| GO:0071345 | cellular response to cytokine stimulus  |
| GO:0019221 | cytokine-mediated signaling pathway     |
| GO:0007166 | cell surface receptor signaling pathway |
| GO:0009615 | response to virus                       |
| GO:0007165 | signal transduction                     |
| GO:0034097 | response to cytokine                    |
| GO:0051607 | defense response to virus               |
| GO:0008219 | cell death                              |
| GO:0012501 | programmed cell death                   |
| GO:0065008 | regulation of biological quality        |

497  
498  
499  
500  
501  
502  
503

504 **Table 3: Significantly enriched gene ontology (Overrepresented  $p$  value < 0.05) terms in**  
505 **SARS-CoV-2 infected adult cells (relative to naïve cells)**  
506

---

|            | <b>Term</b>                                                                      |
|------------|----------------------------------------------------------------------------------|
| GO:0050907 | Detection of chemical stimulus involved in sensory perception                    |
| GO:0050906 | detection of stimulus involved in sensory perception                             |
| GO:0009593 | detection of chemical stimulus                                                   |
| GO:0007606 | sensory perception of chemical stimulus                                          |
| GO:0051606 | detection of stimulus                                                            |
| GO:0050911 | detection of chemical stimulus involved in sensory perception of smell           |
| GO:0007186 | G protein-coupled receptor signaling pathway                                     |
| GO:0007608 | Sensory perception of smell                                                      |
| GO:0007600 | sensory perception                                                               |
| GO:0003008 | system process                                                                   |
| GO:0050877 | nervous system process                                                           |
| GO:0002027 | regulation of heart rate                                                         |
| GO:0003015 | heart process                                                                    |
| GO:0060047 | heart contraction                                                                |
| GO:0008016 | regulation of heart contraction                                                  |
| GO:0006805 | xenobiotic metabolic process                                                     |
| GO:0001580 | detection of chemical stimulus involved in sensory perception of bitter<br>taste |
| GO:0050912 | detection of chemical stimulus involved in sensory perception of taste           |
| GO:0050913 | sensory perception of bitter taste                                               |
| GO:0007187 | G protein-coupled receptor signaling                                             |

---

507  
508  
509  
510  
511  
512  
513  
514  
515  
516  
517  
518

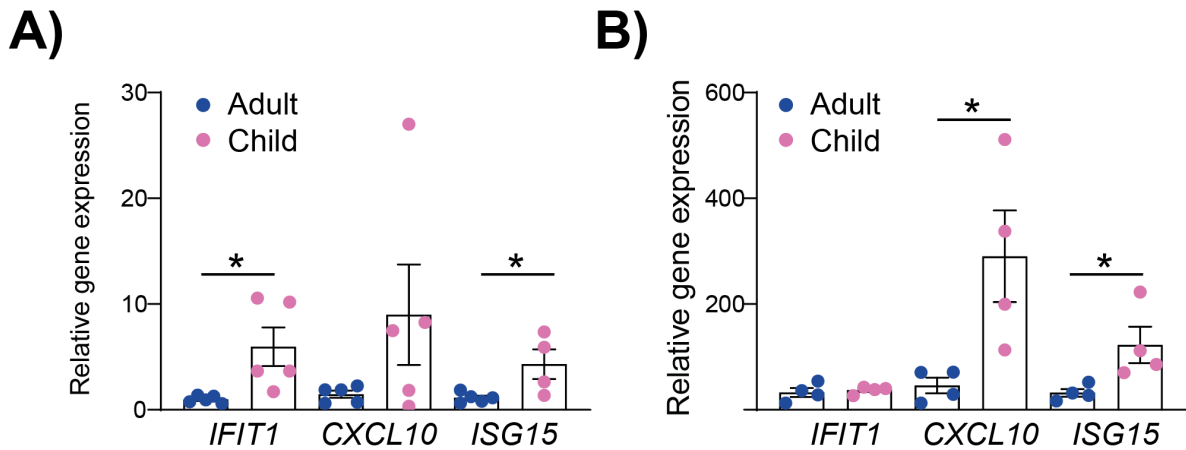

519  
520 **Figure 4: Pediatric epithelial cells have a stronger type I IFN response to viral infection.**  
521 **A)** Expression of interferon associated genes in SARS-CoV-2 (QLD02) infected epithelial  
522 cells relative to uninfected controls (48 hours post-infection). **B)** Expression of interferon  
523 associated genes in influenza A virus infected epithelial cells relative to uninfected controls (48  
524 hours post-infection). Each data point represents a different donor. Gene expression (fold  
525 change) was calculated using the  $\Delta\Delta C_t$  method relative to GAPDH expression. Mean  $\pm$  SEM  
526 is shown.  $p < 0.05$ \*, statistical analysis performed as described in the Materials and Methods.

527  
528

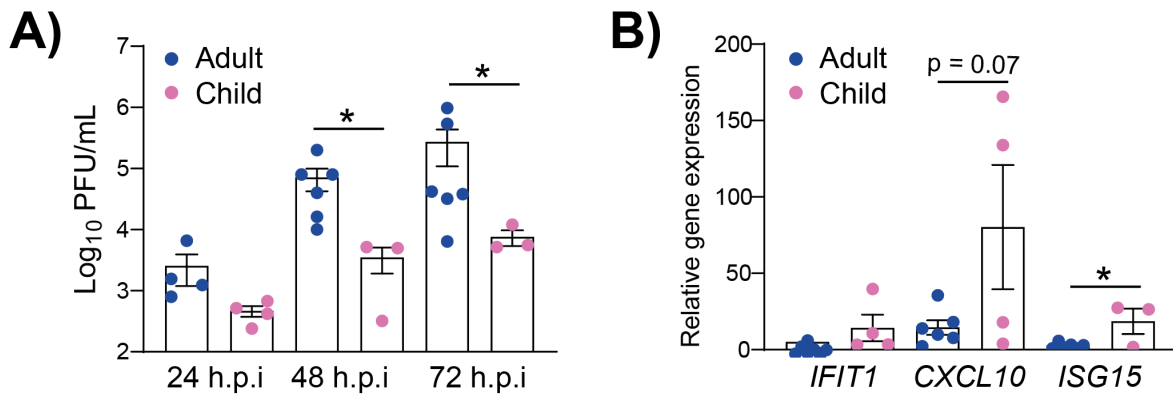

529  
530 **Figure 5. Lower replication of SARS-CoV-2 Alpha variant in pediatric nasal epithelial**  
531 **cells. A)** Plaque forming units (PFU) of SARS-CoV-2 from the apical surface of nasal epithelial  
532 cells NECs obtained at 24, 48 and 72 h.p.i. **B)** Expression of interferon associated genes in  
533 influenza A virus infected epithelial cells relative to uninfected controls (48 h.p.i). Each data  
534 point represents a different donor. Gene expression (fold change) was calculated using the  $\Delta\Delta C_t$   
535 method relative to GAPDH expression. Mean  $\pm$  SEM is shown.  $p < 0.05$ \*. Statistical analysis  
536 performed as described in the Materials and Methods.  
537

538  
539  
540  
541  
542

543 **DISCUSSION**

544 Large clinical data sets and systematic reviews suggest that children are less often infected and  
545 symptomatic with SARS-CoV-2 than adults <sup>7,40-42</sup>. However, the mechanisms driving these  
546 observations have been unclear. Here, we have provided the first experimental evidence that  
547 the pediatric nasal epithelium may play an important role in reducing the susceptibility of  
548 children to SARS-CoV-2 infection.

549  
550 Previous studies have suggested that the reduced susceptibility of children to SARS-CoV-2  
551 infection is due to reduced expression of ACE2 and TMPRSS2 mRNA. Specifically, it has been  
552 hypothesized that the lower level of ACE2 and TMPRSS2 in pediatric upper airways epithelial  
553 cells limits viral infectivity in children <sup>17</sup>, although this has remained somewhat controversial  
554 <sup>18,19</sup>. In the present study, whilst there was a trend towards decreased ACE2 protein levels in  
555 pediatric NECs there was significant donor-to-donor variability that precluded statistical  
556 significance. We interpret these data as suggesting that ACE2 levels may contribute to, but are  
557 not the sole factor, in the increased resistance of children to SARS-CoV-2.

558  
559 Despite donor-to-donor differences in ACE2 expression, we consistently observed a significant  
560 reduction in SARS-CoV-2 (QLD02) replication in pediatric NECs compared to NECs of adults.  
561 Given that the nasal epithelium is the first site of SARS-CoV-2 infection these data are  
562 consistent with the reduced number of SARS-CoV-2 infected children recorded in  
563 epidemiological studies <sup>43,44</sup>. There have been previous suggestions that nasopharyngeal SARS-  
564 CoV-2 titers in children and adolescents are equivalent to those of adults <sup>45-47</sup>. However,  
565 reanalysis of the aforementioned studies has shown that young children (<10 years old) did  
566 indeed have a significantly lower viral load <sup>48</sup>, or that the comparison was being performed  
567 between children in the first 2 days of symptoms and hospitalized adults with severe disease <sup>49</sup>  
568 or that the dataset included few children younger than 16 years <sup>50</sup>. Indeed, it is challenging to  
569 compare data from controlled experimental studies to data obtained from patient sampling,  
570 where it is difficult to control for time of sampling relative to the onset of infection. Rather,  
571 decreased viral replication in pediatric epithelial cells is consistent with experimental studies in  
572 ferrets where aged ferrets showed higher viral load and longer nasal virus shedding <sup>51</sup>.

573  
574 Consistent with reduced SARS-CoV-2 replication in the nasal epithelium of children, pediatric  
575 epithelial cells had a more pronounced pro-inflammatory response (compared to adult cells)  
576 following a SARS-CoV-2 infection. In particular, a pronounced interferon response and the  
577 expression of interferon stimulated genes (*ISGs*) was higher in infected pediatric, compared to  
578 adult, NECs. Increased *ISG* expression, and the subsequent anti-viral response may contribute  
579 to the reduced viral replication observed in pediatric cells. Importantly, unlike the lower  
580 respiratory tract, any resultant cell death or immunopathology in the upper respiratory tract is  
581 unlikely to lead to respiratory distress and therefore remains beneficial to the host <sup>24</sup>. These

582 findings are consistent with those of Maughan et al, who analyzed transcriptional profile of  
583 airway (tracheobronchial) epithelium and observed upregulated type I and II *IFNs* associated  
584 genes in children <sup>23</sup>. Similarly, in the nasal fluid of children and adults presenting to the  
585 emergency department with SARS-CoV-2 there were significantly higher levels of *IFN-α2* in  
586 the fluid derived from children. Increased interferon signaling was also recorded in the  
587 nasopharyngeal transcriptome of children compared to that of adults during early SARS-CoV-  
588 2 infection <sup>18,22</sup>. The question remains as to why pediatric epithelial cells mount a stronger  
589 inflammatory and anti-viral response to SARS-CoV-2 compared to adult cells. This may  
590 represent an adaptation to the increased antigenic challenge observed in childhood.  
591 Alternatively, it is possible that increased antigenic exposure in childhood ‘trains’ nasal  
592 epithelium in children to mount a stronger pro-inflammatory response to any antigenic  
593 challenge. It is also possible that metabolic differences between pediatric and NECs (as  
594 potentially suggested by the different morphologies of the cells) could alter gene expression. It  
595 is also important to recognize that these data may not be applicable to all patient populations as  
596 previous studies of children and adults hospitalized with COVID-19 did not find an age-  
597 dependent difference in the interferon response <sup>52</sup>.

598

599 A pronounced pro-inflammatory and anti-viral response in pediatric cells was not restricted to  
600 SARS-CoV-2 infection and a similar result was observed following influenza virus infection.  
601 However, influenza virus replicated equally as well in pediatric cells compared to adults. These  
602 data are consistent with the high sensitivity of children to influenza virus infection <sup>39</sup>. These  
603 data are also seemingly discordant with the increased interferon response of pediatric cells.  
604 However, SARS-CoV-2 is highly sensitive to interferon treatment, more so than influenza A  
605 virus <sup>53,54</sup>. Therefore, we speculate that whilst the differential interferon response between  
606 children and adults is sufficient to inhibit SARS-CoV-2 replication, it is not sufficient to inhibit  
607 influenza virus replication.

608

609 The growing dominance of SARS-CoV-2 VOCs has raised speculation that the epidemiology  
610 of SARS-CoV-2 infection has fundamentally changed. Namely, there have been suggestions  
611 children are more susceptible to VOCs compared to the original Wuhan isolate <sup>55</sup>. This is  
612 difficult to discern using epidemiological data alone, as data are confounded by the fact that  
613 unlike adults, young children are not routinely vaccinated. The data presented here would  
614 suggest that the pediatric epithelium still confers some protection against the replication of the  
615 Alpha variant. Whether this remains true of other VOCs (including the more recent Delta  
616 variant), and in a more complex *in vivo* situation, remains to be determined.

617

618 Finally, it is important to recognize the limitations of this study. Due to the difficulties  
619 associated with obtaining NECs from children only a limited number of donors could be used  
620 for this study. However, as donors were not selected according to susceptibility to respiratory

621 viral infection, their responses should be broadly representative of healthy children.  
622 Furthermore, our data focused on the role of nasal epithelial cells in age-dependent differences  
623 in SARS-CoV-2 infection. However, there may be other mechanisms to explain the reduced  
624 susceptibility of children to SARS-CoV-2 infection that were not measured in the present study.  
625 For example, children and adolescents have much higher titers of preexisting antibodies to  
626 SARS-CoV-2 compared to adults <sup>16</sup>. This study is unable to ascertain if this plays a more  
627 significant role than the nasal epithelium in protecting children from infection *in vivo*. Finally,  
628 it is important to recognize that it is possible that the data presented herein were not the result  
629 of age differences between pediatric and adult NECs and were instead the result of another  
630 undefined factor that was also different between the two patient groups.

631  
632 Despite these potential limitations, the data presented here strongly suggest that the nasal  
633 epithelium of children is distinct and that it may afford children some level of protection from  
634 SARS-CoV-2 infection.

635  
636  
637  
638

#### 639 **Author Contributions:**

640 The authors meet criteria for authorship as recommended by the International Committee of  
641 Medical Journal Editors, contributed to the manuscript and have given final approval for the  
642 version to be published. Y.Z. and K.R.S. wrote the manuscript. T.R.K, A.C.B., K.M.S. and  
643 K.R.S. designed the study, Y.Z., K.Y.C., A.Y., L.L, T.Y., A.A.K., C.J.S. and H.B.O. collected  
644 the data. Y.Z., K.Y.C., A.C.K., C.J.S., Y.X., D.M., A.K., M.J., G.B., F.A.M. and K.R.S.  
645 analyzed the data. Y.Z., A.C.K. M.J., G.B. and K.R.S. designed the figures. P.D.S. K.M.S.  
646 and K.R.S. recruited study participants. All authors approved the final manuscript.

#### 647 **Acknowledgments**

648 We greatly thank the participants in the study and the members of the research team. We would  
649 also like to acknowledge health care providers and their families worldwide.

650  
651  
652

#### **Funding**

653 This work is supported by the Australia Research Council (Fellowship DE180100512 to  
654 K.R.S and Discovery Early Career Researcher Award DE190100565 to M.J.), The National  
655 Health and Medical Research Council (Project grant APP1139316 and Senior research  
656 Fellowship APP1155794 to F.A.M.), and Academy of Finland and COVID19 research  
657 donations (Grant 318434 to G.B.).

658  
659  
660  
661  
662



663 **SUPPLEMENTARY FIGURES:**  
664

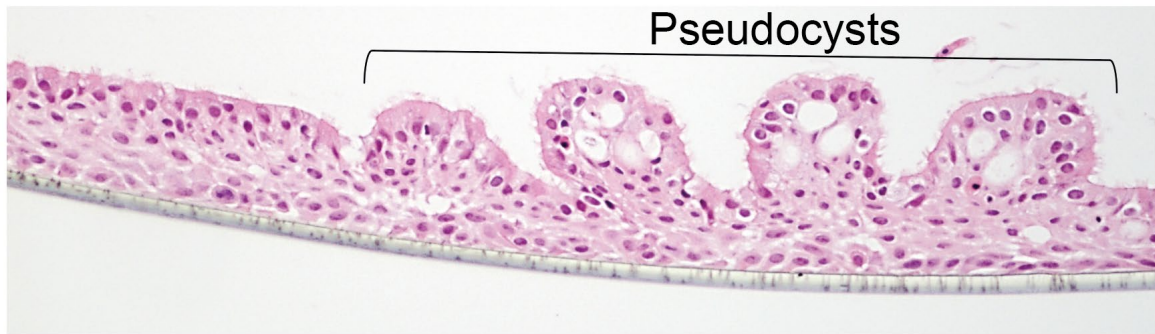

665 **Supplementary Figure 1: Pediatric nasal epithelial cells display pseudocysts.**  
666 Representative Hematoxylin & Eosin-stained section of pediatric NECs culture differentiated  
667 at an air-liquid interface.  
668  
669

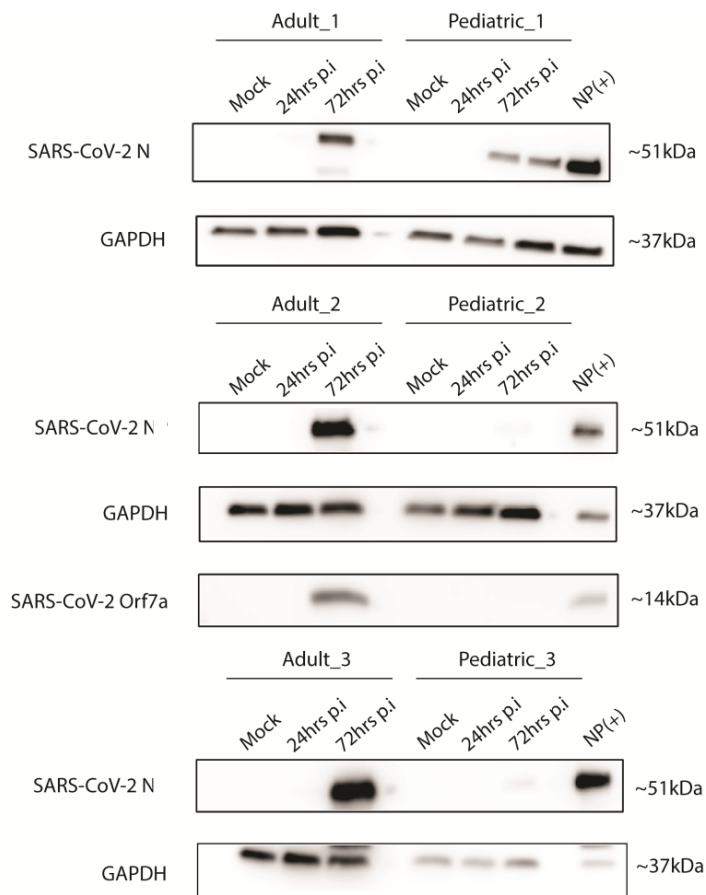

670  
671

672 **Supplementary Figure 2. Relative SARS-CoV-2 NP levels compared to GAPDH in pediatric and**  
673 **adult NECs.** Western blot of adults and pediatric donors blotted for SARS-CoV-2 N at various  
674 timepoints post-infection (n=3 adults (2 females, 1 male) and n = 3 children (1 female, 2 males)).  
675  
676

677 **REFERENCES**

- 678 1. Lu X, Zhang L, Du H, et al. SARS-CoV-2 Infection in Children. *New England Journal of Medicine*  
679 2020; **382**(17): 1663-5.
- 680 2. Lee P-I, Hu Y-L, Chen P-Y, Huang Y-C, Hsueh P-R. Are children less susceptible to COVID-19? *J*  
681 *Microbiol Immunol Infect* 2020; **53**(3): 371-2.
- 682 3. Lanari M, Chierighin A, Biserni GB, Rocca A, Re MC, Lazzarotto T. Children and SARS-CoV-2  
683 infection: innocent bystanders...until proven otherwise. *Clin Microbiol Infect* 2020; **26**(9): 1130-2.
- 684 4. Team CC-R. Coronavirus Disease 2019 in Children - United States, February 12-April 2, 2020.  
685 *MMWR Morb Mortal Wkly Rep* 2020; **69**(14): 422-6.
- 686 5. Tagarro A, Epalza C, Santos M, et al. Screening and Severity of Coronavirus Disease 2019 (COVID-  
687 19) in Children in Madrid, Spain. *JAMA Pediatr* 2021; **175**(3): 316-7.
- 688 6. Kuchar E, Załęski A, Wronowski M, et al. Children were less frequently infected with SARS-CoV-2  
689 than adults during 2020 COVID-19 pandemic in Warsaw, Poland. *European Journal of Clinical*  
690 *Microbiology & Infectious Diseases* 2021; **40**(3): 541-7.
- 691 7. Zhu Y, Bloxham CJ, Hulme KD, et al. A meta-analysis on the role of children in SARS-CoV-2 in  
692 household transmission clusters. *Clin Infect Dis* 2020: ciaa1825.
- 693 8. Goldstein E, Lipsitch M, Cevik M. On the Effect of Age on the Transmission of SARS-CoV-2 in  
694 Households, Schools, and the Community. *The Journal of Infectious Diseases* 2021; **223**(3): 362-9.
- 695 9. Hua C-Z, Miao Z-P, Zheng J-S, et al. Epidemiological features and viral shedding in children with  
696 SARS-CoV-2 infection. *Journal of Medical Virology* 2020; **92**(11): 2804-12.
- 697 10. Khateeb J, Li Y, Zhang H. Emerging SARS-CoV-2 variants of concern and potential intervention  
698 approaches. *Critical Care* 2021; **25**(1): 244.
- 699 11. Nyberg T, Twhig KA, Harris RJ, et al. Risk of hospital admission for patients with SARS-CoV-2  
700 variant B.1.1.7: cohort analysis. *Bmj* 2021; **373**: n1412.
- 701 12. Somekh I, Sharabi A, Dory Y, Simões EAF, Somekh E. Intrafamilial Spread and Altered  
702 Symptomatology of SARS-CoV-2, During Predominant Circulation of Lineage B.1.1.7 Variant in Israel.  
703 *Pediatr Infect Dis J* 2021; **40**(8): e310-e1.
- 704 13. Ladhani SN, Ireland G, Baawuah F, et al. Emergence of SARS-CoV-2 Alpha (B.1.1.7) variant,  
705 infection rates, antibody seroconversion and seroprevalence rates in secondary school students and  
706 staff: active prospective surveillance, December 2020 to March 2021, England. *Journal of Infection*  
707 2021.

- 708 14. Meyer M, Holfter A, Ruebsteck E, et al. The Alpha Variant (B.1.1.7) of SARS-CoV-2 in Children:  
709 First Experience from 3544 Nucleic Acid Amplification Tests in a Cohort of Children in Germany.  
710 *Viruses* 2021; **13**(8).
- 711 15. Longini IM, Jr., Koopman JS, Monto AS, Fox JP. Estimating household and community  
712 transmission parameters for influenza. *Am J Epidemiol* 1982; **115**(5): 736-51.
- 713 16. Ng KW, Faulkner N, Cornish GH, et al. Preexisting and de novo humoral immunity to SARS-CoV-2  
714 in humans. *Science* 2020; **370**(6522): 1339-43.
- 715 17. Bunyavanich S, Do A, Vicencio A. Nasal Gene Expression of Angiotensin-Converting Enzyme 2 in  
716 Children and Adults. *JAMA* 2020; **323**(23): 2427-9.
- 717 18. Pierce CA, Sy S, Galen B, et al. Natural mucosal barriers and COVID-19 in children. *JCI Insight*  
718 2021; **6**(9).
- 719 19. Wark PAB, Pathinayake PS, Kaiko G, et al. ACE2 expression is elevated in airway epithelial cells  
720 from older and male healthy individuals but reduced in asthma. *Respirology* 2021: doi:  
721 10.1111/resp.14003.
- 722 20. Hoffmann M, Kleine-Weber H, Schroeder S, et al. SARS-CoV-2 Cell Entry Depends on ACE2 and  
723 TMPRSS2 and Is Blocked by a Clinically Proven Protease Inhibitor. *Cell* 2020; **181**(2): 271-80.e8.
- 724 21. Saheb Sharif-Askari N, Saheb Sharif-Askari F, Alabed M, et al. Airways Expression of SARS-CoV-2  
725 Receptor, ACE2, and TMPRSS2 Is Lower in Children Than Adults and Increases with Smoking and  
726 COPD. *Molecular Therapy - Methods & Clinical Development* 2020; **18**: 1-6.
- 727 22. Loske J, Röhmel J, Lukassen S, et al. Pre-activated anti-viral innate immunity in the upper airways  
728 controls early SARS-CoV-2 infection in children. *medRxiv* 2021: 2021.06.24.21259087.
- 729 23. Maughan EF, Nigro E, Pennycuick A, et al. Cell-intrinsic differences between human airway  
730 epithelial cells from children and adults. *bioRxiv* 2020: 2020.04.20.027144.
- 731 24. Lucas C, Wong P, Klein J, et al. Longitudinal analyses reveal immunological misfiring in severe  
732 COVID-19. *Nature* 2020; **584**(7821): 463-9.
- 733 25. Short KR, Kroeze EJBV, Fouchier RAM, Kuiken T. Pathogenesis of influenza-induced acute  
734 respiratory distress syndrome. *The Lancet Infectious Diseases* 2014; **14**(1): 57-69.
- 735 26. Hou YJ, Okuda K, Edwards CE, et al. SARS-CoV-2 Reverse Genetics Reveals a Variable Infection  
736 Gradient in the Respiratory Tract. *Cell* 2020; **182**(2): 429-46.e14.
- 737 27. Gordon DE, Jang GM, Bouhaddou M, et al. A SARS-CoV-2 protein interaction map reveals targets  
738 for drug repurposing. *Nature* 2020; **583**(7816): 459-68.

- 739 28. Short KR, Diavatopoulos DA, Reading PC, et al. Using bioluminescent imaging to investigate  
740 synergism between *Streptococcus pneumoniae* and influenza A virus in infant mice. *J Vis Exp* 2011;  
741 (50).
- 742 29. Siegers JY, Novakovic B, Hulme KD, et al. A High-Fat Diet Increases Influenza A Virus-Associated  
743 Cardiovascular Damage. *The Journal of Infectious Diseases* 2020; **222**(5): 820-31.
- 744 30. S A. FastQC: a quality control tool for high throughput sequence data. Available online at:  
745 <http://www.bioinformatics.babraham.ac.uk/projects/fastqc>). 2020.
- 746 31. Ewels P, Magnusson M, Lundin S, Källner M. MultiQC: summarize analysis results for multiple  
747 tools and samples in a single report. *Bioinformatics* 2016; **32**(19): 3047-8.
- 748 32. Patro R, Duggal G, Love MI, Irizarry RA, Kingsford C. Salmon provides fast and bias-aware  
749 quantification of transcript expression. *Nat Methods* 2017; **14**(4): 417-9.
- 750 33. Love MI, Huber W, Anders S. Moderated estimation of fold change and dispersion for RNA-seq  
751 data with DESeq2. *Genome Biol* 2014; **15**(12): 550.
- 752 34. Ritchie ME, Phipson B, Wu D, et al. limma powers differential expression analyses for RNA-  
753 sequencing and microarray studies. *Nucleic Acids Res* 2015; **43**(7): e47.
- 754 35. Law CW, Chen Y, Shi W, Smyth GK. voom: Precision weights unlock linear model analysis tools  
755 for RNA-seq read counts. *Genome Biol* 2014; **15**(2): R29.
- 756 36. Young MD, Wakefield MJ, Smyth GK, Oshlack A. Gene ontology analysis for RNA-seq: accounting  
757 for selection bias. *Genome Biology* 2010; **11**(2): R14.
- 758 37. Bardanzellu F, Fanos V. How could metabolomics change pediatric health? *Italian Journal of*  
759 *Pediatrics* 2020; **46**(1): 37.
- 760 38. Yazicioglu T, Mühlfeld C, Autilio C, et al. Aging impairs alveolar epithelial type II cell function in  
761 acute lung injury. *Am J Physiol Lung Cell Mol Physiol* 2020; **319**(5): L755-L69.
- 762 39. Kondrich J, Rosenthal M. Influenza in children. *Curr Opin Pediatr* 2017; **29**(3): 297-302.
- 763 40. Lachassinne E, de Pontual L, Caseris M, et al. SARS-CoV-2 transmission among children and staff  
764 in daycare centres during a nationwide lockdown in France: a cross-sectional, multicentre,  
765 seroprevalence study. *Lancet Child Adolesc Health* 2021.
- 766 41. Stringhini S, Wisniak A, Piumatti G, et al. Seroprevalence of anti-SARS-CoV-2 IgG antibodies in  
767 Geneva, Switzerland (SEROCoV-POP): a population-based study. *Lancet* 2020; **396**(10247): 313-9.

- 768 42. Tönshoff B, Müller B, Elling R, et al. Prevalence of SARS-CoV-2 Infection in Children and Their  
769 Parents in Southwest Germany. *JAMA Pediatrics* 2021.
- 770 43. Mehta NS, Mytton OT, Mullins EWS, et al. SARS-CoV-2 (COVID-19): What Do We Know About  
771 Children? A Systematic Review. *Clin Infect Dis* 2020; **71**(9): 2469-79.
- 772 44. Zimmermann P, Curtis N. Why is COVID-19 less severe in children? A review of the proposed  
773 mechanisms underlying the age-related difference in severity of SARS-CoV-2 infections. *Archives of*  
774 *Disease in Childhood* 2020: archdischild-2020-320338.
- 775 45. Baggio S, L'Huillier AG, Yerly S, et al. SARS-CoV-2 viral load in the upper respiratory tract of  
776 children and adults with early acute COVID-19. *Clin Infect Dis* 2020.
- 777 46. Chung E, Chow EJ, Wilcox NC, et al. Comparison of Symptoms and RNA Levels in Children and  
778 Adults With SARS-CoV-2 Infection in the Community Setting. *JAMA Pediatr* 2021.
- 779 47. Jacot D, Greub G, Jaton K, Opota O. Viral load of SARS-CoV-2 across patients and compared to  
780 other respiratory viruses. *Microbes Infect* 2020; **22**(10): 617-21.
- 781 48. Li X, Xu W, Dozier M, He Y, Kirolos A, Theodoratou E. The role of children in transmission of  
782 SARS-CoV-2: A rapid review. *J Glob Health* 2020; **10**(1): 011101.
- 783 49. Yonker LM, Neilan AM, Bartsch Y, et al. Pediatric Severe Acute Respiratory Syndrome  
784 Coronavirus 2 (SARS-CoV-2): Clinical Presentation, Infectivity, and Immune Responses. *J Pediatr* 2020;  
785 **227**: 45-52.e5.
- 786 50. Singanayagam A, Patel M, Charlett A, et al. Duration of infectiousness and correlation with RT-  
787 PCR cycle threshold values in cases of COVID-19, England, January to May 2020. *Euro Surveill* 2020;  
788 **25**(32).
- 789 51. Young-Il K, Kwang-Min Y, June-Young K, et al. Age-dependent pathogenic characteristics of  
790 SARS-CoV-2 infection in ferrets. *Research Square* 2021.
- 791 52. Koch CM, Prigge AD, Anekalla KR, et al. Immune response to SARS-CoV-2 in the nasal mucosa in  
792 children and adults. *medRxiv* 2021: 2021.01.26.21250269.
- 793 53. Blanco-Melo D, Nilsson-Payant BE, Liu W-C, et al. Imbalanced Host Response to SARS-CoV-2  
794 Drives Development of COVID-19. *Cell* 2020; **181**(5): 1036-45.e9.
- 795 54. Wu W, Metcalf JP. The Role of Type I IFNs in Influenza: Antiviral Superheroes or  
796 Immunopathogenic Villains? *Journal of Innate Immunity* 2020; **12**(6): 437-47.

797 55. van Oosterhout C, Stephenson JF, Weimer B, Ly H, Hall N, Tyler KM. COVID-19 adaptive  
798 evolution during the pandemic – Implications of new SARS-CoV-2 variants on public health policies.  
799 *Virulence* 2021; **12**(1): 2013-6.

800
